# Supplementary material
Source: PubMed Central journal article supplement (PMC1413898)

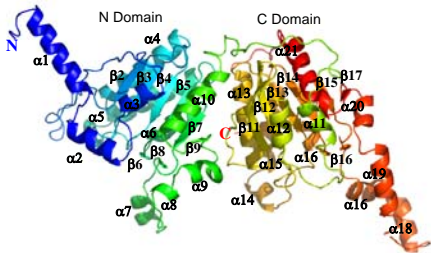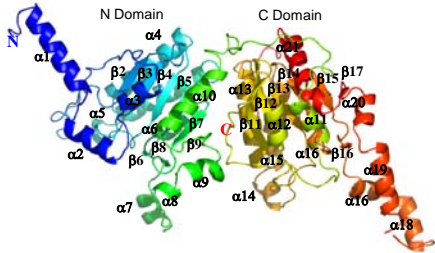

Supplement: pnas_0510580103_1.pdf [file pnas_0510580103_1.pdf]

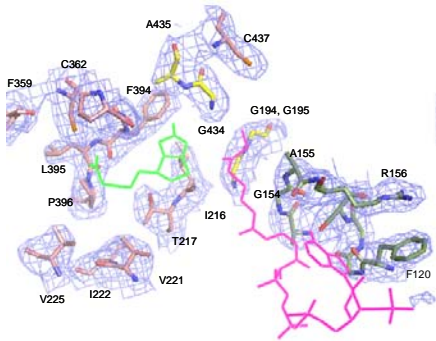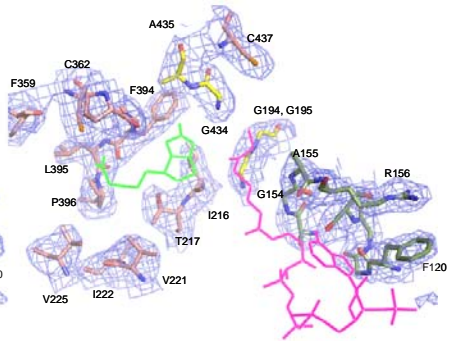

Supplement: pnas_0510580103_3.pdf [file pnas_0510580103_3.pdf]
